# Supplementary material for: Extended-spectrum β-lactamase-encoding genes are spreading on a wide range of Escherichia coli plasmids existing prior to the use of third-generation cephalosporins
Source: PubMed Central journal article supplement (PMC6202452; doi:10.1099/mgen.0.000203), 2018-08-06
Supplement: mgen-4-203-s001.pdf [file mgen-4-203-s001.pdf]

**Table S1.** Characteristics of the 73 ESBL producing-strains and of the 87 plasmids studied

| Parental strains |                             |                   |                      |                   |                          |                       |                              |                               | Plasmids in the recipient strains |           |                        |           |                                 | Reference <sup>®</sup> | GenBank accession no |
|------------------|-----------------------------|-------------------|----------------------|-------------------|--------------------------|-----------------------|------------------------------|-------------------------------|-----------------------------------|-----------|------------------------|-----------|---------------------------------|------------------------|----------------------|
| Strain ID        | Host                        | Geographic origin | Samples <sup>†</sup> | Year of isolation | Phylo group <sup>†</sup> | cMLST IP <sup>‡</sup> | ESBL production <sup>§</sup> | Plasmid transfer <sup>#</sup> | Plasmid ID                        | Length bp | Inc group <sup>¶</sup> | pMLST     | ESBL gene                       |                        |                      |
| 03-235           | <i>Gallus gallus</i>        | France            | Bacteraemia          | 2003              | D                        | 48                    | +                            | C                             | RCS72                             | 108.661   | I1                     | ST3       | <i>bla</i> <sub>CTX-M-1</sub>   | (1)                    | LT985273             |
| 03-237           | <i>Sus scrofa domestica</i> | France            | UTI                  | 2004              | D                        | 597                   | +                            | C                             | RCS73                             | 93.239    | I1                     | ST49      | <i>bla</i> <sub>CTX-M-1</sub>   | (1)                    | LT985288             |
| 13942            | <i>Bos taurus</i>           | France            | Diarrhea             | 2004              | NA                       |                       | +                            | C                             | RCS74_pI                          | 94.836    | I1                     | ST179     | <i>bla</i> <sub>CTX-M-1</sub>   | (1)                    | LT985283             |
| 13947            | <i>Gallus gallus</i>        | France            | Bacteraemia          | 2004              | A                        | 478                   | +                            | C                             | RCS74_pII                         | 7.133     | MOB <sub>RNA</sub>     |           | -                               |                        | LT985282             |
| 13948            | <i>Bos taurus</i>           | France            | UTI                  | 2004              | C                        | 7                     | +                            | C                             | RCS75_pI                          | 108.379   | I1                     | ST3       | <i>bla</i> <sub>CTX-M-1</sub>   | (1)                    | LT985280             |
|                  |                             |                   |                      |                   |                          |                       |                              |                               | RCS76_pI                          | 110.066   | I1                     | ST3       | <i>bla</i> <sub>CTX-M-1</sub>   |                        | LT985286             |
|                  |                             |                   |                      |                   |                          |                       |                              |                               | RCS76_pII                         | 6.549     | MOB <sub>RNA</sub>     |           | -                               | (1)                    | LT985284             |
|                  |                             |                   |                      |                   |                          |                       |                              |                               | RCS76_pIII                        | 4.054     | MOB <sub>repB1</sub>   |           | -                               |                        | LT985285             |
| 1454             | <i>Equus caballus</i>       | Belgium           | Funiculitis          | 2009              | A                        | 2                     | +                            | C                             | RCS78                             | 239.460   | HI1, FIA, Q-1          | ST9       | <i>bla</i> <sub>CTX-M-2</sub>   | (3)                    | LT985296             |
| 4410             | <i>Equus caballus</i>       | Belgium           | Arthritis            | 2007              | A                        | 736                   | +                            | C                             | RCS79                             | 168.237   | FII, FIB, Q-1          | F18:A-B1  | <i>bla</i> <sub>CTX-M-2</sub>   | (3)                    | LT985293             |
| B1-54            | <i>Gallus gallus</i>        | Belgium           | Faeces               | 2007              | A                        | 715                   | +                            | C                             | RCS71                             | 91.635    | I1                     | ST36      | <i>bla</i> <sub>TEM-52c</sub>   | (2)                    | LT985281             |
| B4-25            | <i>Gallus gallus</i>        | Belgium           | Faeces               | 2007              | D                        | 45                    | +                            | C                             | RCS77                             | 235.943   | HI2                    | ST2       | <i>bla</i> <sub>CTX-M-2</sub>   | (2)                    | LT985297             |
| B4-75            | <i>Gallus gallus</i>        | Belgium           | Faeces               | 2007              | B1                       | 88                    | +                            | C                             | RCS80                             | 87.487    | I1                     | ST31      | <i>bla</i> <sub>CTX-M-15</sub>  | (2)                    | LT985289             |
| 83               | <i>Homo sapiens</i>         | France            | Faeces               | 1998              | A                        | 716                   | +                            | C                             | RCS1TR83                          | 174.073   | A/C                    |           | <i>bla</i> <sub>TEM-24</sub>    | (4) (5)                | LT985220             |
| 89               | <i>Homo sapiens</i>         | France            | Faeces               | 1999              | C                        | 717                   | +                            | C                             | RCS2TR89                          | 175.317   | A/C                    |           | <i>bla</i> <sub>TEM-24</sub>    | (4) (5)                | LT985225             |
| 167              | <i>Homo sapiens</i>         | France            | UTI                  | 1998              | B1                       | 88                    | +                            | E                             | RCS39                             | 85.621    | A/C                    |           | <i>bla</i> <sub>CTX-M-2</sub>   | (4) (5)                | LT985244             |
| 170              | <i>Homo sapiens</i>         | France            | Misc. infection      | 1998              | A                        | 2                     | +                            | C                             | RCS38                             | 211.452   | A/C, N2                |           | <i>bla</i> <sub>SHV-12</sub>    | (4) (5)                | LT985250             |
| 177              | <i>Homo sapiens</i>         | France            | Misc. colonisation   | 1998              | A                        | 664                   | +                            | C                             | RCS53                             | 54.684    | N                      | ST6       | <i>bla</i> <sub>CTX-M-15</sub>  | (4) (5)                | LT985266             |
| 195              | <i>Homo sapiens</i>         | France            | Faeces               | 1999              | A                        | 718                   | +                            | C                             | RCS46                             | 216.620   | A/C, R                 |           | <i>bla</i> <sub>CTX-M-15</sub>  | (4) (5)                | LT985249             |
| 364              | <i>Homo sapiens</i>         | France            | Faeces               | 2002              | B2                       | 27                    | +                            | C                             | RCS57TR364                        | 98.763    | FII                    | F2:A-B-   | <i>bla</i> <sub>SHV-12</sub>    | (4) (5)                | LT985265             |
| 473              | <i>Homo sapiens</i>         | France            | Misc. infection      | 2001              | D                        | 737                   | +                            | E                             | RCS52                             | 134.392   | FII, FIA, FIB          | F22:A4:B1 | <i>bla</i> <sub>CTX-M-15</sub>  | (4) (5)                | LO017736             |
| 497              | <i>Homo sapiens</i>         | France            | UTI                  | 2001              | B2                       | 4                     | +                            | E                             | RCS21                             | 121.741   | FII, FIB               | F51:A-B10 | <i>bla</i> <sub>SHV-2 (2)</sub> | (4) (5)                | LT985219             |
| 499              | <i>Homo sapiens</i>         | France            | UTI                  | 2000              | D                        | 719                   | +                            | C                             | RCS68                             | 86.943    | K                      |           | <i>bla</i> <sub>CTX-M-14</sub>  | (4) (5)                | LT985278             |
| 502              | <i>Homo sapiens</i>         | France            | UTI                  | 2000              | C                        | 74                    | +                            | E                             | RCS45                             | 41.540    | N                      | ST1       | <i>bla</i> <sub>CTX-M-1</sub>   | (4) (5)                | LT985251             |
| TN03             | <i>Homo sapiens</i>         | France            | UTI                  | 2001              | B2                       | 43                    | +                            | E                             | RCS22                             | 128.281   | FII, FIA               | F2:A1:B-  | <i>bla</i> <sub>CTX-M-15</sub>  | (6)                    | LT985221             |
| 506              | <i>Homo sapiens</i>         | France            | UTI                  | 2001              | D                        | 720                   | +                            | E                             | RCS62_pI                          | 70.033    | FII                    | F2:A-B-   | <i>bla</i> <sub>CTX-M-14</sub>  | (4) (5)                | LT985272             |
| 511              | <i>Homo sapiens</i>         | France            | Faeces               | 1994              | B1                       | 88                    | +                            | E                             | RCS54                             | 137.900   | P1-like phage, Q-1     |           | <i>bla</i> <sub>CTX-M-9</sub>   | (4) (5)                | LT985263             |
| 513              | <i>Homo sapiens</i>         | France            | Bacteraemia          | 1999              | F                        | 721                   | +                            | C                             | RCS30                             | 157.836   | A/C                    |           | <i>bla</i> <sub>CTX-M-14</sub>  | (4) (5)                | LT985224             |
| 518              | <i>Homo sapiens</i>         | France            | UTI                  | 2001              | B1                       | 349                   | +                            | E                             | RCS28                             | 95.442    | FII                    | F2:A-B-   | <i>bla</i> <sub>SHV-12</sub>    | (4) (5)                | LT985227             |
| 522              | <i>Homo sapiens</i>         | France            | UTI                  | 1995              | A                        | 2                     | +                            | C                             | RCS65                             | 121.498   | FII                    | F2:A-B-   | <i>bla</i> <sub>CTX-M-14</sub>  | (4) (5)                | LT985277             |
| 523              | <i>Homo sapiens</i>         | France            | UTI                  | 1997              | D                        | 722                   | +                            | C                             | RCS42                             | 42.311    | N                      | ST1       | <i>bla</i> <sub>CTX-M-1</sub>   | (4) (5)                | LT985245             |
| 525              | <i>Homo sapiens</i>         | France            | UTI                  | 1998              | B2                       | 4                     | +                            | C                             | RCS27                             | 118.656   | FIB, FII               | F51:B10   | <i>bla</i> <sub>SHV-2</sub>     | (4) (5)                | LT985226             |
| 533              | <i>Homo sapiens</i>         | France            | UTI                  | 1999              | B2                       | 33                    | +                            | E                             | RCS12TR533                        | 14.248    | MOB <sub>RNA</sub>     |           | <i>bla</i> <sub>TEM-3</sub>     | (4) (5)                | LT985216             |
| 541              | <i>Homo sapiens</i>         | France            | Faeces               | 2000              | A                        | 723                   | +                            | E                             | RCS18TR541                        | 130.621   | A/C                    |           | <i>bla</i> <sub>TEM-21</sub>    | (4) (5)                | LT985218             |
| 548              | <i>Homo sapiens</i>         | France            | Misc. infection      | 2000              | A                        | 2                     | +                            | E                             | RCS24TR548                        | 175.038   | A/C                    |           | <i>bla</i> <sub>TEM-24</sub>    | (4) (5)                | LT985222             |
| 552              | <i>Homo sapiens</i>         | France            | UTI                  | 2001              | A                        | 2                     | +                            | E                             | RCS28TR552                        | 157.534   | A/C                    |           | <i>bla</i> <sub>TEM-3</sub>     | (4) (5)                | LT985228             |
| 557              | <i>Homo sapiens</i>         | France            | Faeces               | 2001              | A                        | 11                    | +                            | E                             | RCS32TR557                        | 93.070    | Y                      |           | <i>bla</i> <sub>TEM-24</sub>    | (4) (5)                | LT985234             |
| 565              | <i>Homo sapiens</i>         | France            | Bacteraemia          | 2002              | B1                       | 87                    | +                            | E                             | RCS35_pI                          | 4.087     | MOB <sub>repB1</sub>   |           | -                               | (4) (5)                | LT985232             |
|                  |                             |                   |                      |                   |                          |                       |                              |                               | RCS35_pII                         | 14.365    | MOB <sub>RNA</sub>     |           | <i>bla</i> <sub>SHV-12</sub>    |                        | LT985233             |
|                  |                             |                   |                      |                   |                          |                       |                              |                               | RCS49_pI                          | 80.790    | I1                     | 232       | -                               |                        | LT985256             |
|                  |                             |                   |                      |                   |                          |                       |                              |                               | RCS49_pII                         | 4.074     | MOB <sub>repB1</sub>   |           | -                               | (4) (5)                | LT985255             |
| 580              | <i>Homo sapiens</i>         | France            | Bacteraemia          | 2002              | B2                       | 9                     | +                            | C                             | RCS49_pIII                        | 15.843    | MOB <sub>RNA</sub>     |           | <i>bla</i> <sub>SHV-12</sub>    |                        | LT985254             |
|                  |                             |                   |                      |                   |                          |                       |                              |                               | RCS49_pIV                         | 20.798    | MOB <sub>RNA</sub>     |           | <i>bla</i> <sub>SHV-12</sub>    |                        | LT985257             |

|                      |                     |        |                    |      |    |     |   |   |            |         |                      |            |                                |         |          |
|----------------------|---------------------|--------|--------------------|------|----|-----|---|---|------------|---------|----------------------|------------|--------------------------------|---------|----------|
| 592                  | <i>Homo sapiens</i> | France | UTI                | 2002 | B1 | 632 | + | C | RCS44      | 42.084  | N                    | ST1        | <i>bla</i> <sub>CTX-M-1</sub>  | (4) (5) | LT985259 |
| 604                  | <i>Homo sapiens</i> | France | UTI                | 2002 | C  | 738 | + | E | RCS43      | 44.494  | N                    | ST1        | <i>bla</i> <sub>CTX-M-1</sub>  | (4) (5) | LT985242 |
| 631                  | <i>Homo sapiens</i> | France | Faeces             | 2002 | A  | 2   | + | E | RCS63      | 22.308  | RelN <sub>RNA</sub>  |            | <i>bla</i> <sub>CTX-M-14</sub> | (4) (5) | LT985269 |
| 637                  | <i>Homo sapiens</i> | France | UTI                | 2002 | F  | 724 | + | C | RCS61      | 87.290  | FII                  | F2:A-B-    | <i>bla</i> <sub>CTX-M-15</sub> | (4) (5) | LT985267 |
| 641                  | <i>Homo sapiens</i> | France | Faeces             | 2002 | B1 | 739 | + | C | RCS33_pI   | 88.922  | I1                   | ST136      | <i>bla</i> <sub>TEM-52c</sub>  | (4) (5) | LT985236 |
|                      |                     |        |                    |      |    |     |   |   | RCS33_pII  | 6.647   | MOB <sub>RNA</sub>   |            | -                              | (4) (5) | LT985237 |
| 649                  | <i>Homo sapiens</i> | France | Faeces             | 2002 | A  | 2   | + | C | RCS101     | 70.309  | FII                  | F2:A-B-    | <i>bla</i> <sub>CTX-M-14</sub> | (4) (5) | LT985214 |
| 650                  | <i>Homo sapiens</i> | France | Faeces             | 2002 | D  | 740 | + | C | RCS64_pI   | 3,002   | MOB <sub>RNA</sub>   |            | -                              | (4) (5) | LT985294 |
|                      |                     |        |                    |      |    |     |   |   | RCS64_pII  | 91,307  | I1                   | ST31       | <i>bla</i> <sub>CTX-M-15</sub> | (4) (5) | LT985295 |
| 654                  | <i>Homo sapiens</i> | France | UTI                | 2002 | A  | 2   | + | C | RCS34      | 111.333 | I1                   | ST3        | <i>bla</i> <sub>CTX-M-1</sub>  | (4) (5) | LT985235 |
| 657                  | <i>Homo sapiens</i> | France | UTI                | 2000 | A  | 664 | + | E | RCS50      | 42.913  | X1                   |            | <i>bla</i> <sub>CTX-M-15</sub> | (4) (5) | LT985261 |
| 659                  | <i>Homo sapiens</i> | France | UTI                | 2001 | B2 | 43  | + | E | RCS32      | 7.050   | MOB <sub>repB1</sub> |            | <i>bla</i> <sub>CTX-M-15</sub> | (4) (5) | LT985240 |
| 660                  | <i>Homo sapiens</i> | France | Faeces             | 2001 | A  | 398 | + | C | RCS48TR660 | 157,228 | A/C                  |            | <i>bla</i> <sub>TEM-52</sub>   | (4) (5) | LT985253 |
| 661                  | <i>Homo sapiens</i> | France | UTI                | 2002 | B2 | 43  | + | C | RCS59      | 130.559 | FII, FIA             | F2:A1:B-   | <i>bla</i> <sub>CTX-M-15</sub> | (4) (5) | LT985271 |
| 666                  | <i>Homo sapiens</i> | France | UTI                | 2002 | D  | 8   | + | E | RCS51      | 179,021 | FII, FIB             | F18:A-B34  | <i>bla</i> <sub>CTX-M-9</sub>  | (4) (5) | LT985252 |
| 676                  | <i>Homo sapiens</i> | France | Bacteraemia        | 2002 | B2 | 43  | + | E | RCS60      | 63.009  | L/M                  |            | <i>bla</i> <sub>CTX-M-14</sub> | (4) (5) | LT985279 |
| 690                  | <i>Homo sapiens</i> | France | UTI                | 2002 | A  | 741 | + | E | pRCS57     | 143.225 | FII, FIA, FIB        | F31:A4:B1  | <i>bla</i> <sub>CTX-M-15</sub> | (4) (5) | LO017738 |
| 692                  | <i>Homo sapiens</i> | France | UTI                | 2001 | C  | 74  | + | E | RCS29_pI   | 89.006  | I1                   | ST36       | <i>bla</i> <sub>TEM-52c</sub>  | (4) (5) | LT985238 |
|                      |                     |        |                    |      |    |     |   |   | RCS29_pII  | 33.899  | X-like               |            | -                              | (4) (5) | LT985239 |
| 694                  | <i>Homo sapiens</i> | France | UTI                | 2001 | A  | 2   | + | C | RCS55_pI   | 90.270  | L/M                  |            | <i>bla</i> <sub>CTX-M-3</sub>  | (4) (5) | LT985387 |
|                      |                     |        |                    |      |    |     |   |   | RCS55_pII  | 6,859   | MOB <sub>RNA</sub>   |            | -                              | (4) (5) | LT985386 |
| 699                  | <i>Homo sapiens</i> | France | UTI                | 2002 | B1 | 24  | + | C | RCS58      | 117.655 | I1                   | ST29       | <i>bla</i> <sub>CTX-M-2</sub>  | (4) (5) | LT985268 |
| 707                  | <i>Homo sapiens</i> | France | UTI                | 2002 | B2 | 43  | + | C | RCS67      | 63.787  | X4                   |            | <i>bla</i> <sub>CTX-M-15</sub> | (4) (5) | LT985276 |
| 708                  | <i>Homo sapiens</i> | France | UTI                | 2002 | B2 | 43  | + | C | RCS102     | 129.394 | FII, FIA             | F2:A1:B-   | <i>bla</i> <sub>CTX-M-15</sub> | (4) (5) | LT985213 |
| 711                  | <i>Homo sapiens</i> | France | Faeces             | 2002 | B2 | 10  | + | E | RCS25      | 42.584  | N2                   |            | <i>bla</i> <sub>SHV-5</sub>    | (4) (5) | LT985223 |
| 713                  | <i>Homo sapiens</i> | France | UTI                | 1989 | B1 | 742 | + | C | RCS36      | 217,183 | FIIK, FIA            | FK7:A10:B- | <i>bla</i> <sub>SHV-3</sub>    | (4) (5) | LT985229 |
| 715                  | <i>Homo sapiens</i> | France | UTI                | 2003 | D  | 8   | + | E | RCS103     | 67.968  | FII                  | F4:A-B-    | <i>bla</i> <sub>CTX-M-14</sub> | (4) (5) | LT985217 |
| 716                  | <i>Homo sapiens</i> | France | UTI                | 2002 | B2 | 221 | + | E | RCS56      | 90.206  | K                    |            | <i>bla</i> <sub>CTX-M-14</sub> | (4) (5) | LT985270 |
| 717                  | <i>Homo sapiens</i> | France | Faeces             | 2003 | A  | 716 | + | C | RCS51TR717 | 86,770  | L/M                  |            | <i>bla</i> <sub>TEM-3</sub>    | (4) (5) | LT985264 |
| 719                  | <i>Homo sapiens</i> | France | Faeces             | 2002 | B2 | 743 | + | E | RCS52TR719 | 38.610  | X1                   |            | <i>bla</i> <sub>TEM-52</sub>   | (4) (5) | LT985262 |
|                      |                     |        |                    |      |    |     |   |   | RCS48_pI   | 80.596  | I1                   | 232        | -                              | (4) (5) | LT985248 |
| 720                  | <i>Homo sapiens</i> | France | UTI                | 2003 | B2 | 9   | + | C | RCS48_pII  | 19.813  | MOB <sub>RNA</sub>   |            | <i>bla</i> <sub>SHV-12</sub>   | (4) (5) | LT985247 |
|                      |                     |        |                    |      |    |     |   |   | RCS48_pIII | 4.772   | MOB <sub>RNA</sub>   |            | -                              | (4) (5) | LT985246 |
| 721                  | <i>Homo sapiens</i> | France | Faeces             | 2003 | B2 | 725 | + | E | RCS40      | 90.291  | L/M                  |            | <i>bla</i> <sub>CTX-M-3</sub>  | (4) (5) | LT985241 |
| 722                  | <i>Homo sapiens</i> | France | Faeces             | 2002 | B2 | 36  | + | C | RCS41      | 159.550 | A/C                  |            | <i>bla</i> <sub>TEM-3</sub>    | (4) (5) | LT985243 |
| 723                  | <i>Homo sapiens</i> | France | Misc. infection    | 2002 | B2 | 506 | + | C | RCS66      | 70.325  | FII                  | F2:A-B-    | <i>bla</i> <sub>CTX-M-14</sub> | (4) (5) | LT985274 |
| 724                  | <i>Homo sapiens</i> | France | Faeces             | 2002 | B1 | 726 | + | C | RCS53TR724 | 157.225 | A/C                  |            | <i>bla</i> <sub>TEM-3</sub>    | (4) (5) | LT985260 |
| 725                  | <i>Homo sapiens</i> | France | UTI                | 2002 | B1 | 744 | + | E | RCS47      | 115.154 | P1-like phage        |            | <i>bla</i> <sub>SHV-2</sub>    | (4) (5) | FO818745 |
| 726                  | <i>Homo sapiens</i> | France | Faeces             | 2002 | B2 | 745 | + | C | RCS54TR726 | 157.227 | A/C                  |            | <i>bla</i> <sub>TEM-21</sub>   | (4) (5) | LT985258 |
| 727                  | <i>Homo sapiens</i> | France | Faeces             | 2003 | B2 | 4   | + | E | RCS55TR727 | 40.984  | RelN IncR            |            | <i>bla</i> <sub>TEM-52</sub>   | (4) (5) | LT985322 |
|                      |                     |        |                    |      |    |     |   |   | RCS37_pI   | 10.551  | MOB <sub>RNA</sub>   |            | -                              | (4) (5) | LT985230 |
|                      |                     |        |                    |      |    |     |   |   | RCS37_pII  | 114.286 | I1                   | ST178      | <i>bla</i> <sub>SHV-12</sub>   | (4) (5) | LT985231 |
| O102-ST405<br>(TN48) | <i>Homo sapiens</i> | France | UTI                | 2004 | D  | 727 | + | E | ETN48      | 165.657 | FII, FIB, Q-1        | F22:A-B1   | <i>bla</i> <sub>CTX-M-14</sub> | (7)     | FQ482074 |
| 3249 (RD29512)       | <i>Homo sapiens</i> | France | Misc. colonisation | 2009 | A  | 2   | + | E | RCS105     | 175.264 | FII, FIA, FIB        | F31:A4:B1  | <i>bla</i> <sub>CTX-M-15</sub> | (8)     | LO017737 |

\* UTI, urinary tract infection; \*NA, non available; †IC, incomplete sequence type; ‡+, positive; -, negative; #C, conjugation; E, electroporation

† MOBRep, mobilizable plasmid with a replication protein system; MOB<sub>RNA</sub>, mobilizable plasmid with a RNAII/RNAI replication/control system; RelN, relaxase negative plasmid; RelN<sub>RNA</sub>, relaxase negative plasmid with a RNAII/RNAI replication/control system.

\* References, (1) Meunier D et al. (2006) Int J Antimicrob Agents 28:402-407; (2) Smet A et al. (2009) J Antimicrob Chemother 63:1286-1288; (3) Smet A et al. (2012) J Antimicrob Chemother 67:1289-1291; (4) Branger C et al. (2005) Emerg Infect Dis 11:54-61; (5) Marcade G et al. (2009) J Antimicrob Chemother 63:67-71; (6) Lavollay M et al. (2006) Antimicrob Agents Chemother 50:2433-2438; (7) Deschamps C et al. (2009) Microbiology 155:1656-1668; (8) Birgy A et al. (2013) J Clin Microbiol 51:1727-1732.

**Table S2.** Characteristics of the 19 strains isolated before the use of the 3GC and of the 29 plasmids studied

| Strain identity | Host                          | Parental strains  |                      |                   |                          |                       |                         | Plasmid transfer <sup>#</sup> | Plasmids of recipient strains |         |                          |                    |                                                       | Reference <sup>&amp;</sup> | GenBank accession no |
|-----------------|-------------------------------|-------------------|----------------------|-------------------|--------------------------|-----------------------|-------------------------|-------------------------------|-------------------------------|---------|--------------------------|--------------------|-------------------------------------------------------|----------------------------|----------------------|
|                 |                               | Geographic origin | Samples <sup>*</sup> | Year of isolation | Phylo group <sup>+</sup> | cMLST <sup>+</sup> IP | antibiotyp <sup>e</sup> |                               | Plasmid identity              | length  | Inc group <sup>¶</sup>   | pMLST <sup>‡</sup> | Resistance genes <sup>§</sup>                         |                            |                      |
| ECOR 3          | <i>Canis lupus</i>            | USA, Ma           | faeces               | 70s-80s           | A                        | 182                   | Str Tet Sul             | C                             | RCS85_pI                      | 117.804 | II                       | IC                 | <i>aadA1 tetA(A) sul1</i>                             | (1)                        | LT985321             |
|                 |                               |                   |                      |                   |                          |                       |                         |                               | RCS85_pII                     | 102.718 | B/O                      | -                  |                                                       |                            | LT985320             |
| ECOR 4          | <i>Homo sapiens</i>           | USA, IA           | faeces               | 70s-80s           | A                        | 188                   | Str Tet Sul             | E                             | RCS86_pI                      | 6.069   | RelN <sub>RNA</sub>      |                    | <i>sul2</i>                                           | (1)                        | LT985307             |
| ECOR 6          | <i>Homo sapiens</i>           | USA, IA           | faeces               | 70s-80s           | A                        | IC                    | Str Tet                 | E                             | RCS91                         | 13.593  | MOB <sub>RNA</sub>       |                    | <i>tetA(A)</i>                                        | (1)                        | LT985299             |
|                 |                               |                   |                      |                   |                          |                       |                         |                               | RCS83_pI                      | 4.074   | RelN <sub>RNA</sub>      |                    | -                                                     |                            | LT985290             |
| ECOR 10         | <i>Homo sapiens</i>           | USA, NY           | faeces               | 70s-80s           | A                        | 2                     | Sensitive               | None                          | RCS83_pII                     | 2.999   | RelN <sub>RNA</sub>      |                    | -                                                     | (1)                        | LT985291             |
|                 |                               |                   |                      |                   |                          |                       |                         |                               | RCS83_pIII                    | 5.912   | MOB <sub>RNA</sub>       |                    | -                                                     |                            | LT985292             |
| ECOR 17         | <i>Sus scrofa domestica</i>   | Indonesia         | faeces               | 70s-80s           | A                        | 169                   | Str Tet Sul             | E                             | RCS98                         | 6.200   | RelN <sub>RNA</sub>      |                    | <i>strA/B sul2</i>                                    | (1)                        | LT985316             |
| ECOR 18         | <i>Macaca nigra</i>           | USA, WA           | faeces               | 70s-80s           | A                        | 132                   | Sul                     | E                             | RCS87                         | 6.047   | RelN <sub>RNA</sub>      |                    | <i>sul2</i>                                           | (1)                        | LT985298             |
| ECOR 19         | <i>Macaca nigra</i>           | USA, WA           | faeces               | 70s-80s           | A                        | 170                   | Str Tet Sul             | E                             | RCS81                         | 37.543  | X2                       |                    | <i>tetA(A)</i>                                        | (1)                        | LT985317             |
| ECOR 24         | <i>Homo sapiens</i>           | Sweden            | faeces               | 70s-80s           | A                        | 176                   | Str Sul                 | C                             | RCS90_pI                      | 92.968  | B/O                      |                    | <i>strA/B sul2</i>                                    | (1)                        | LT985300             |
|                 |                               |                   |                      |                   |                          |                       |                         |                               | RCS90_pII                     | 11.964  | MOB <sub>repB2</sub>     |                    | <i>strA/B</i>                                         |                            | LT985301             |
| ECOR 25         | <i>Canis lupus familiaris</i> | USA, NY           | faeces               | 70s-80s           | A                        | 177                   | Str Tet Sul             | E                             | RCS92_pI                      | 6.222   | RelN <sub>RNA</sub>      |                    | <i>strA/B sul2</i>                                    | (1)                        | LT985314             |
|                 |                               |                   |                      |                   |                          |                       |                         |                               | RCS92_pIII                    | 3.174   | RelN <sub>RNA</sub>      |                    | -                                                     |                            | LT985312             |
| ECOR 30         | <i>Bison bison</i>            | Canada, AB        | faeces               | 70s-80s           | B1                       | 183                   | Str Tet                 | C                             | RCS96_pI                      | 37.454  | X 4                      |                    | -                                                     | (1)                        | LT985318             |
|                 |                               |                   |                      |                   |                          |                       |                         |                               | RCS96_pII                     | 147.478 | FII, FIB                 | F24:A-:B1          | <i>strA/B tetA(B)</i>                                 |                            | LT985319             |
| ECOR 31         | <i>Panthera pardus</i>        | USA, WA           | faeces               | 70s-80s           | E                        | 250                   | Amp Str kan Tet Sul     | C                             | RCS89                         | 89.661  | FII                      | F2:A-:B-           | <i>bla<sub>TEM-1</sub> aadA1 aphA-1b tetA(B) sul1</i> | (1)                        | LT985304             |
| ECOR 37         | <i>Callithrix</i>             | USA, WA           | faeces               | 70s-80s           | E                        | 187                   | Str kan Tet Sul Cm      | E                             | RCS88                         | 93.395  | FII                      | F2:A-:B-           | <i>aadA1 aphA-1 tetA(A) sul1 cat</i>                  | (1)                        | LT985306             |
| ECOR 39         | <i>Homo sapiens</i>           | Sweden            | faeces               | 70s-80s           | F                        | 254                   | Sensitive               | None                          | RCS82_pI                      | 47.789  | Phage P2 like            |                    | -                                                     | (1)                        | LT985302             |
|                 |                               |                   |                      |                   |                          |                       |                         |                               | RCS82_pII                     | 23.526  | MOB <sub>RNA</sub> , FIB |                    | -                                                     |                            | LT985303             |
| ECOR 48         | <i>Homo sapiens</i>           | Sweden            | UTI                  | 70s-80s           | D                        | 256                   | Str Tet Sul             | C                             | RCS84                         | 83.309  | FII                      | F2:A-:B-           | <i>aadA1 tetA(C) sul1</i>                             | (1)                        | LT985305             |
| ECOR 70         | <i>Gorilla gorilla</i>        | USA, WA           | faeces               | 70s-80s           | C                        | 211                   | Sul                     | C                             | RCS99                         | 47.447  | X1                       |                    | <i>sul2</i>                                           | (1)                        | LT985315             |
| IAI 27          | <i>Homo sapiens</i>           | France            | UTI                  | 80s               | D                        | IC                    | Cm                      | E                             | RCS100                        | 106.000 | II                       | ST7                | <i>cat</i>                                            | (2)                        | LT985215             |
| R71             | <i>Homo sapiens</i>           | France            | faeces               | 1969              | NA                       |                       | Amp Str Tet Sul Cr      | C                             | RCS70                         | 91.487  | FII                      | F6:A-:B-           | <i>blaSHV-1 aadA1 tetA(D) cat sul1</i>                | (3)                        | LT985275             |
| RPC3            | <i>Homo sapiens</i>           | Canada            | faeces               | 1958              | NA                       |                       | Str Kan                 | C                             | RCS69_pII                     | 49.251  | N-like                   |                    | <i>strA/B aphA-2</i>                                  | (3)                        | LT985287             |
|                 |                               |                   |                      |                   |                          |                       |                         |                               | RCS93_pI                      | 83.523  | FII, FIB                 | F29:A-:B1          | -                                                     |                            | LT985309             |
| CIP106223       | <i>Homo sapiens</i>           | UK                | NA                   | 1932              | F                        | IC                    | Sensitive               | None                          | RCS93_pII                     | 35.258  | IncUN                    |                    | -                                                     | (4)                        | LT985310             |
|                 |                               |                   |                      |                   |                          |                       |                         |                               | RCS93_pIII                    | 5.631   | MOB <sub>RNA</sub>       |                    | -                                                     |                            | LT985311             |
|                 |                               |                   |                      |                   |                          |                       |                         |                               | RCS93_pIV                     | 4.913   | MOB <sub>RNA</sub>       |                    | -                                                     |                            | LT985308             |

\* UTI, urinary tract infection; <sup>+</sup>NA, non available; <sup>‡</sup>IC, incomplete sequence type;; <sup>#</sup>C, conjugation; E, electroporation; <sup>§</sup> -, absence

<sup>¶</sup> MOBRep, mobilizable plasmid with a replication protein system; MOB<sub>RNA</sub>, mobilizable plasmid with a RNAII/RNAI replication/control system; RelN, relaxase negative plasmid; RelN<sub>RNA</sub>, relaxase negative plasmid with a RNAII/RNAI replication/control system; UN unknown.

<sup>&</sup> References, (1) Ochman H and Selander RK. (1984) J Bacteriol 157:690-693; (2) Picard B et al. (199) Infect Immun 67:546-553; (3) INRA, UR1282 collection; (4) Hughes VM and Datta N. (1983) Nature 302:725-726.

**Table S3. Primers used to detect the insertion site of the *bla*<sub>CTX-M-15</sub> transposition unit in the *tnpA* of Tn2 transposon (*bla*<sub>TEM-1</sub>-*tnpR*- $\Delta$ *tnpA*-Tn2-*ISEcp1*-*bla*<sub>CTX-M-15</sub>-*orf477*- $\Delta$ *tnpA*)**

| PCR target                                   | Primer name                      | Primer sequence *           |
|----------------------------------------------|----------------------------------|-----------------------------|
| <i>ΔtnpA</i> - <i>ISEcp1</i> region          | <b>Primer pair 1</b>             |                             |
|                                              | <i>tnpA</i> - <i>ISEcp1</i> FW   | 5'-CCGATATGCCCGTTGACTT-3'   |
|                                              | <i>tnpA</i> - <i>ISEcp1</i> Rev  | 5'- CCGCAGAGCATGGTCTTTAT-3' |
| <i>orf 477</i> - $\Delta$ <i>tnpA</i> region | <b>Primer pair 2</b>             |                             |
|                                              | <i>orf 477</i> - <i>tnpA</i> Fw  | 5'-GGCAGCCACGGGTTGATA-3'    |
|                                              | <i>orf 477</i> - <i>tnpA</i> Rev | 5'-AAGACGGGTAAGGCGAAATG-3'  |

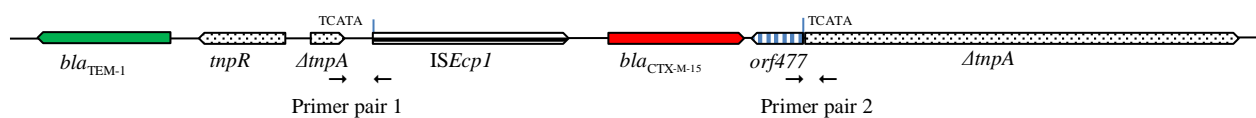

\*Schematic representation of the insertion site of the *bla*<sub>CTX-M-15</sub> transposition unit in the Tn2 transposon
